# Supplementary material for: The nanoscale structure and unoccupied valence electronic states in FeSe1−xTex chalcogenides probed by X-ray absorption measurements
Source: Royal Society of Chemistry journal article supplement (doi:10.1039/c5cp01740h), 2015-01-01
Supplement: c5cp01740h1.pdf [file c5cp01740h1.pdf]

## Electronic Supplementary Information

# Nanoscale structure and unoccupied valence electronic states in $\text{FeSe}_{1-x}\text{Te}_x$ chalcogenides probed by x-ray absorption measurements

M.Y. Hacisalihoglu, E. Paris, B. Joseph, E. Yanmaz and N.L. Saini

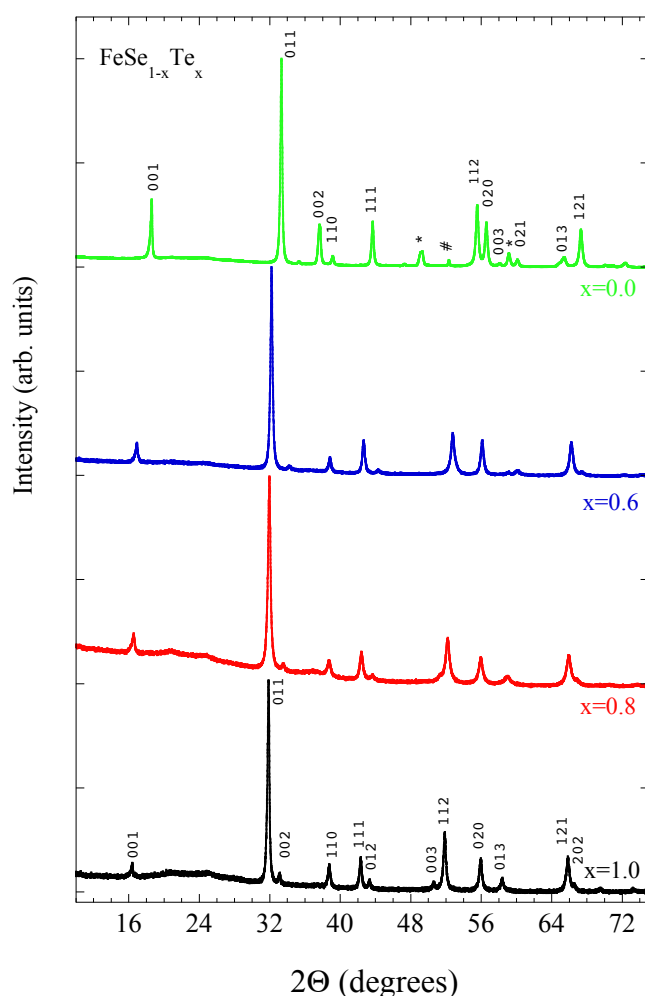

**Fig. S1:** XRD patterns for several samples of  $\text{FeSe}_{1-x}\text{Te}_x$ . The diffraction peaks were indexed using a tetragonal  $P4/nmm$  space group. A small amount of impurity of hexagonal  $\text{Fe}_7\text{Se}_8$  phase and unreacted iron was found in the binary  $\text{FeSe}$ , however, the ternary  $\text{FeSe}_{1-x}\text{Te}_x$  were found to be free from any detectable impurity phases.
